# Supplementary material
Source: ML conference proceedings conference paper supplement (https://www.ecva.net/papers/eccv_2022/papers_ECCV/html/136960165_ECCV_2022_paper.php)
Supplement: Supplementary file 1 [file 136960165-supp.pdf]

# Supplementary Material

## GRIT: Faster and Better Image captioning Transformer Using Dual Visual Features

Van-Quang Nguyen<sup>1</sup>, Masanori Suganuma<sup>1,2</sup>, and Takayuki Okatani<sup>1,2</sup>

<sup>1</sup> Graduate School of Information Sciences, Tohoku University

<sup>2</sup> RIKEN Center for AIP

{quang,suganuma,okatani}@vision.is.tohoku.ac.jp

### A Additional Details for Object Detection

#### A.1 Object Detection Datasets

When pretraining our model on the four datasets (i.e., Visual Genome (VG), COCO, OpenImages, and Objects365), we follow [10] to build a unified training corpus with the statistics shown in Table 1 except that we do not use the annotations from COCO stuff [4]. The resultant corpus has 2.49M unique images with 1848 categories.

Table 1: Statistics of the pretraining datasets for object detection.

| Source     | VG   | COCO | Objects365 | OpenImages |
|------------|------|------|------------|------------|
| Images     | 97k  | 111k | 609k       | 1.67M      |
| Categories | 1594 | 80   | 365        | 500        |
| Sampling   | ×8   | ×8   | ×2         | ×1         |

#### A.2 Implementation Details

For the object detector, we set the number of queries  $N = 150$ , the number of sampling points equal to 4, and the hidden dimension  $d = 512$ . The backbone network weights are initialized by the weights of Swin-Base ( $384 \times 384$ ) pretrained on ImageNet21K [9]. Following [11], the loss for normalized bounding box regression for object  $i$ ,  $\mathcal{L}_{box}(b_i, \hat{b}_{\hat{\sigma}(i)})$  is computed as the weighted summation of a box distance  $\mathcal{L}_{l_1}$  and a GIoU loss  $\mathcal{L}_{iou}$ :

$$\mathcal{L}_{l_1}(b_i, \hat{b}_{\hat{\sigma}(i)}) = \|b_i - \hat{b}_{\hat{\sigma}(i)}\|_1, \quad (1)$$

$$\mathcal{L}_{iou}(b_i, \hat{b}_{\hat{\sigma}(i)}) = 1 - \left( \frac{|b_i \cap \hat{b}_{\hat{\sigma}(i)}|}{|b_i \cup \hat{b}_{\hat{\sigma}(i)}|} - \frac{|\mathbf{B}(b_i, \hat{b}_{\hat{\sigma}(i)}) \setminus b_i \cup \hat{b}_{\hat{\sigma}(i)}|}{|\mathbf{B}(b_i, \hat{b}_{\hat{\sigma}(i)})|} \right), \quad (2)$$

$$\mathcal{L}_{box}(b_i, \hat{b}_{\hat{\sigma}(i)}) = \alpha_{l_1} \mathcal{L}_{l_1}(b_i, \hat{b}_{\hat{\sigma}(i)}) + \alpha_{iou} \mathcal{L}_{iou}(b_i, \hat{b}_{\hat{\sigma}(i)}), \quad (3)$$

where  $\alpha_{l_1} = 5$ ,  $\alpha_{iou} = 2$ , and  $\mathbf{B}$  outputs the largest box covering  $b_i$  and  $\hat{b}_{\hat{\sigma}(i)}$ . We also employ two training strategies, i.e., iterative bounding box refinement and auxiliary losses; see [11] and our configuration files for details.

Table 2: Performance of object detection on the COCO and Visual Genome datasets. ‘4DS’ denotes the four object detection datasets.

| Model             | Training Data | mAP (COCO) | mAP <sup>50</sup> (VG) |
|-------------------|---------------|------------|------------------------|
| BUTD [3]          | VG            | -          | 10.2                   |
| VinVL [10]        | 4DS           | 50.5       | 13.8                   |
| GRIT              | VG            | 33.6       | 14.2                   |
| GRIT <sup>†</sup> | 4DS           | 50.8       | 15.1                   |

### A.3 Object Detection Results

Table 2 shows the performance on the COCO validation split and the Visual Genome test split of our object detector compared with VinVL and BUTD [3]. It is seen that the object detector of GRIT attains comparable or higher performance on the two datasets as compared with BUTD and VinVL when pretrained on the similar datasets.

## B Additional Details for Image Captioning

**Class Token** We prepend a class token embedding  $g_{\langle \text{cls} \rangle} \in \mathbb{R}^d$  to  $G_0$  before forwarding them to the grid feature network. We use this class token embedding to predict the emotion category of the input image when training an emotion-grounded model on the ArtEmis dataset; see Sec. B.2.

**Boundary Tokens** Following previous studies, we prepend a special token  $\langle \text{sos} \rangle$  to the beginning of captions, and append another special token  $\langle \text{eos} \rangle$  to the end of captions during training. During inference, we start the generation by setting the first token to  $\langle \text{sos} \rangle$ .

### B.1 Image Captioning on the COCO dataset

**SPICE Sub-category and CLIPscore Metrics** Table 3 reports a breakdown of SPICE F-scores over various sub-categories on the ‘‘Karpathy’’ test split, in comparison with the region-based methods: Up-Down [3], vanilla Transformer [5], and  $\mathcal{M}^2$  Transformer [5]. These scores give a quantitative assessment of performance on different aspects when describing the content of images. As seen in Table 3, our method attains better scores over all sub-categories, showing

Table 3: Breakdown of SPICE F-scores over various sub-categories and the CLIP scores.

| Method                     | SPICE | Object | Attr. | Relation | Color | Count | Size | CLIP |
|----------------------------|-------|--------|-------|----------|-------|-------|------|------|
| Up-Down [3]                | 21.4  | 39.1   | 10.0  | 6.5      | 11.4  | 18.4  | 3.2  | -    |
| Transformer [5]            | 21.1  | 38.6   | 9.6   | 6.3      | 9.2   | 17.5  | 2.0  | -    |
| $\mathcal{M}^2$ Trans. [5] | 22.6  | 40.0   | 11.6  | 6.9      | 12.9  | 20.4  | 3.5  | 73.4 |
| GRIT <sup>†</sup>          | 24.3  | 42.7   | 13.5  | 7.7      | 14.7  | 29.3  | 4.5  | 77.2 |

significant improvement on identifying and counting objects, attributes, and relationships between objects. The table also reports the CLIP scores [6] of the two methods, showing consistent improvement of our method over the compared method.

## B.2 Image Captioning on the ArtEmis dataset

**ArtEmis Dataset** This dataset consists of 80,031 unique images divided into the training, validation, and test splits with the ratios of 85%, 5%, and 10%, respectively. Each caption of a given image is annotated with an emotion label. In total, there are 454,684 captions along with 8 unique emotion categories; see [1] for details.

**Emotion Grounded Model** Following [1], we also trained an emotion grounded model, which predicts the emotion associated with the caption. Specifically, we mapped the updated class embedding  $g_{\langle \text{cls} \rangle}$  into an 8-dimensional vector using a linear projection. During training, we minimized the summation of the two losses, i.e., emotion prediction and caption generation.

**Full Results** Table 4 shows the full results of different models on the test split of the Artemis dataset including the emotion grounded models. It is noted that the ground truth emotion labels are not provided during inference.

## B.3 Image Captioning on the nocaps Dataset

**Full results** We report the full results on the validation split of the nocaps dataset for different domains, i.e., in-domain, near-domain, and out-of-domain, in Table 5.

## B.4 Computational Efficiency

We measured the inference time of GRIT and two representative region-based methods, VinVL [10] and  $\mathcal{M}^2$  Transformer [5], on the same machine having a

Table 4: Performance on the ArtEmis test split.

| Method                     | Emotion | V. E.                     | Performance Metrics |             |             |             |             |             |
|----------------------------|---------|---------------------------|---------------------|-------------|-------------|-------------|-------------|-------------|
|                            |         |                           | Grounded            | Type        | B@1         | B@2         | B@3         | B@4         |
| NN [1]                     | No      | $\mathcal{H}$             | 36.4                | 13.9        | 5.4         | 2.2         | 10.2        | 21.0        |
| ANP [1]                    | No      | $\mathcal{G}$             | 39.6                | 13.4        | 4.2         | 1.4         | 8.8         | 20.2        |
| $\mathcal{M}^2$ Trans. [1] | Yes     | $\mathcal{R}$             | 51.1                | 28.2        | 15.4        | 9.0         | 13.7        | 28.6        |
| $\mathcal{M}^2$ Trans. [1] | No      | $\mathcal{R}$             | 50.7                | 28.2        | 15.9        | 9.5         | 14.0        | 28.0        |
| SAT [1]                    | Yes     | $\mathcal{G}$             | 52.0                | 28.0        | 14.6        | 7.9         | 13.4        | 29.4        |
| SAT [1]                    | No      | $\mathcal{G}$             | 53.6                | 29.0        | 15.5        | 8.7         | 14.2        | 29.7        |
| GRIT <sup>†</sup>          | Yes     | $\mathcal{R}+\mathcal{G}$ | 69.3                | 39.4        | 19.2        | 11.1        | 16.5        | 33.0        |
| GRIT <sup>†</sup>          | No      | $\mathcal{R}+\mathcal{G}$ | <b>70.1</b>         | <b>40.1</b> | <b>20.9</b> | <b>11.3</b> | <b>16.8</b> | <b>33.3</b> |

Table 5: Performance on the nocaps validation split.

| Method                     | V.E                       | in-domain    |             | near-domain  |              | out-domain  |             | Overall     |             |
|----------------------------|---------------------------|--------------|-------------|--------------|--------------|-------------|-------------|-------------|-------------|
|                            |                           | Type         | C           | S            | C            | S           | C           | S           | C           |
| NBT [2]                    | $\mathcal{R}$             | 62.7         | 10.1        | 51.9         | 9.2          | 54.0        | 8.6         | 53.9        | 9.2         |
| Up-down [2]                | $\mathcal{R}$             | 78.1         | 11.6        | 57.7         | 10.3         | 31.3        | 8.3         | 55.3        | 10.1        |
| Trans. [5]                 | $\mathcal{R}$             | 78.0         | 11.0        | -            | -            | 29.7        | 7.8         | 54.7        | 9.8         |
| $\mathcal{M}^2$ Trans. [5] | $\mathcal{R}$             | 85.7         | 12.1        | -            | -            | 38.9        | 8.9         | 64.5        | 11.1        |
| GRIT <sup>†</sup>          | $\mathcal{R}+\mathcal{G}$ | <b>105.9</b> | <b>13.6</b> | <b>92.16</b> | <b>13.05</b> | <b>72.6</b> | <b>11.1</b> | <b>90.2</b> | <b>12.8</b> |

Tesla V100-SXM2 of 16GB memory with CUDA version 10.0 and Driver version 410.104. It has Intel(R) Xeon(R) Gold 6148 CPU. The comparison was conducted following [7,8]. Specifically, we excluded the time of preprocessing the image and loading it to the GPU device. Also, the images are rescaled to the resolutions such that all the compared methods achieve its highest performance for image captioning. For the compared methods, we used the official implementations of  $\mathcal{M}^2$  Transformer<sup>3</sup> and VinVL<sup>4</sup>.

Regarding feature extraction, we extracted the region features from Faster R-CNN using the original implementation<sup>5</sup> used by  $\mathcal{M}^2$  Transformer and another implementation<sup>6</sup> used by VinVL. It is seen that VinVL and  $\mathcal{M}^2$  Transformer spend considerable time on feature extraction due to the forward pass through the CNN backbone with high resolution inputs and the computationally expensive regional operations. It is also noted that VinVL introduced class-agnostic NMS operations, which reduce a great amount of time consumed by class-aware NMS operations in the standard Faster R-CNN. On the other hand, we employ

<sup>3</sup> <https://github.com/aimagelab/meshed-memory-transformer>

<sup>4</sup> <https://github.com/pzzhang/VinVL>

<sup>5</sup> <https://github.com/peteanderson80/bottom-up-attention>

<sup>6</sup> [https://github.com/microsoft/scene\\_graph\\_benchmark](https://github.com/microsoft/scene_graph_benchmark)

a Deformable DETR-based detector to extract region features without using all such operations. Table 6 shows the comparison on feature extraction.

Table 6: The inference time on feature extraction of different methods.

| Method                      | Backbone    | Detector     | Regional Operations                  | Inference Time |
|-----------------------------|-------------|--------------|--------------------------------------|----------------|
| VinVL <sub>large</sub> [10] | ResNeXt-152 | Faster R-CNN | Class-Agnostic NMS<br>RoI Align, etc | 304 ms         |
| $\mathcal{M}^2$ Trans. [5]  | ResNet-101  | Faster R-CNN | Class-Aware NMS<br>RoI Align, etc    | 736 ms         |
| GRIT                        | Swin-Base   | DETR-based   | -                                    | 31 ms          |

Regarding caption generation, all the methods use beam search as the decoding strategy, with beam size of 5 and the maximum caption length of 20. Both  $\mathcal{M}^2$  Transformer and GRIT employ a lightweight caption generator (caption decoder) having only 3 transformer layers with hidden dimension of 512 while VinVL<sub>large</sub> has 24 transformer layers with hidden dimension of 1024; see Table 7. Thus, with the visual features as inputs,  $\mathcal{M}^2$  Transformer and GRIT spend less inference time generating words than VinVL<sub>large</sub> in the autoregressive manner.

Table 7: The inference time on caption generation of different methods.

| Method                          | No. of Layers | Hidden Dim. | Inference Time |
|---------------------------------|---------------|-------------|----------------|
| VinVL <sub>large</sub> [10]     | 24            | 1024        | 542 ms         |
| $\mathcal{M}^2$ Transformer [5] | 3             | 512         | 174 ms         |
| GRIT                            | 3             | 512         | 138 ms         |

## B.5 Qualitative Examples

Figure 1, 2, 3, and 4 show some examples of the captions generated by our proposed method (GRIT) and another region-based method ( $\mathcal{M}^2$  Transformer) given the same input images from the COCO test split. It is observed that the generated captions from GRIT are qualitatively better than those generated by the baseline method in terms of detecting and counting objects as well as describing their relationships in the given images. The inaccuracy of the captions generated by the baseline method might be due to the drawbacks of the region features extracted by a frozen pretrained object detector which produces wrong detection and lacks of contextual information.

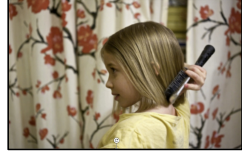

**GT-1:** a child is brushing her hair in the mirror  
**GT-2:** a little girl is brushing her hair in a bathroom  
**M<sup>2</sup>:** a young girl holding a baseball bat in a  
**GRIT:** a little girl brushing her hair with a brush

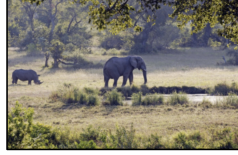

**GT-1:** an elephant walking not too far from a rhino in a forest  
**GT-2:** an elephant and a rhino share a field with a pond  
**M<sup>2</sup>:** a group of elephants grazing in a field  
**GRIT:** an elephant and a rhino standing in a field

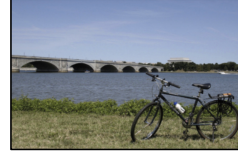

**GT-1:** a bike is parked alongside the lake shore  
**GT-2:** a bike is parked on the grass in front of the lake  
**M<sup>2</sup>:** a bicycle leaning against a bridge over the water  
**GRIT:** a bike parked next to a bridge on the water

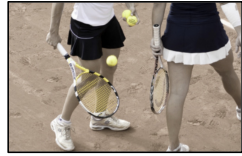

**GT-1:** 2 female tennis players standing with their rackets  
**GT-2:** a pair of young women hold tennis balls and rackets  
**M<sup>2</sup>:** a woman hitting a tennis racket  
**GRIT:** 2 people hold tennis rackets and balls on a court

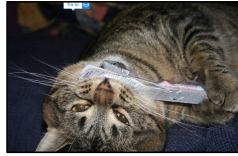

**GT-1:** a cat holding a toothbrush in its mouth  
**GT-2:** a cat chewing on a packaged pink toothbrush  
**M<sup>2</sup>:** a cat laying on top of a pair of scissors  
**GRIT:** a cat with a toothbrush in its mouth on

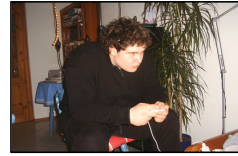

**GT-1:** the boy is playing video games in his bedroom  
**GT-2:** a young man is sitting in a chair playing a video game  
**M<sup>2</sup>:** a young man sitting in a chair holding a wii remote  
**GRIT:** a man sitting in a chair playing a video game

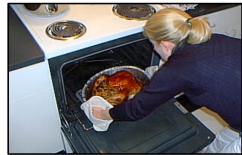

**GT-1:** a woman is taking a turkey out of the oven  
**GT-2:** a woman is taking the cooked turkey out of the oven.  
**M<sup>2</sup>:** a woman taking a pizza out of an oven with a  
**GRIT:** a woman taking a turkey out of an oven with

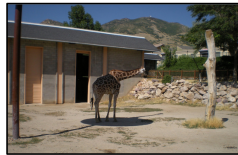

**GT-1:** a giraffe standing outside of a building next to a tree.  
**GT-2:** a giraffe standing in a small piece of shade.  
**M<sup>2</sup>:** two giraffes are standing in a zoo enclosure  
**GRIT:** a giraffe standing in the dirt next to a building

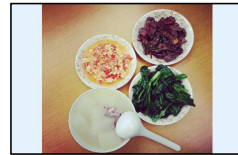

**GT-1:** bowls on a table with meat and vegetables.  
**GT-2:** four plates of different kind of food sitting on a table  
**M<sup>2</sup>:** three plates of food on a wooden table with a  
**GRIT:** four bowls of food and a spoon on a table

Fig. 1: Qualitative examples from our method (GRIT) and a region-based method ( $M^2$  Transformer) on the COCO test images. Zoom in for better view.

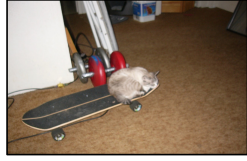

**GT-1:** a white cat is laying on a black skateboard  
**GT-2:** A cat is sleeping on a skateboard.  
**M<sup>2</sup>:** a kitten laying on the floor next to a skateboard  
**GRIT:** a cat laying on a skateboard on the floor

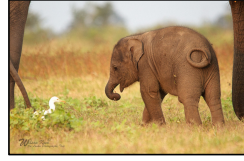

**GT-1:** A baby elephant looking at a white duck  
**GT-2:** A small elephant standing next to a white bird  
**M<sup>2</sup>:** an elephant in a field with two birds in the  
**GRIT:** a baby elephant walking in a field of grass

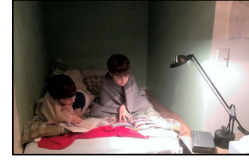

**GT-1:** Two children wrapped in blankets reading on a bed.  
**GT-2:** Two children reading while lying in their bed  
**M<sup>2</sup>:** two people laying in a bed with a  
**GRIT:** two young boys sitting on a bed reading a book

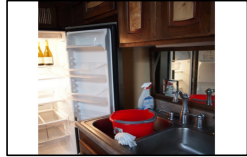

**GT-1:** a kitchen with a refrigerator next to a sink.  
**GT-2:** a red bucket sits in a sink next to an open refrigerator  
**M<sup>2</sup>:** an open refrigerator with the door open in a kitchen  
**GRIT:** a kitchen with a sink and an open refrigerator

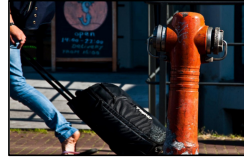

**GT-1:** a woman pulling her luggage past an fire hydrant.  
**GT-2:** a woman pulls a wheeled suitcase past a fire hydrant  
**M<sup>2</sup>:** a person riding a skateboard down a street with a  
**GRIT:** a person pulling a suitcase next to a fire hydrant

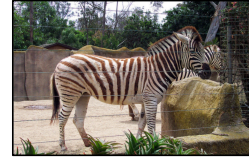

**GT-1:** two zebras in an animal park behind a wire fence  
**GT-2:** two zebras in a zoo, behind a wire fence  
**M<sup>2</sup>:** a zebra standing next to a fence in a  
**GRIT:** two zebras standing behind a fence in a zoo

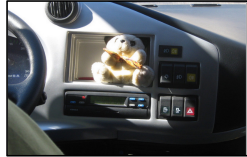

**GT-1:** a small teddy bear is wedged into an opening in a car dashboard  
**GT-2:** little teddy bear attached to the dashboard of the car  
**M<sup>2</sup>:** a stuffed teddy bear sitting in the back of a car  
**GRIT:** a teddy bear sitting on the dashboard of a car

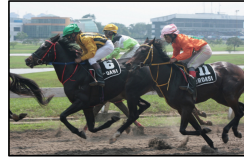

**GT-1:** horses racing on a race track with jockeys  
**GT-2:** a group of jockeys ride horses on a track  
**M<sup>2</sup>:** a group of people riding horses in a  
**GRIT:** a group of jockeys riding horses on a track

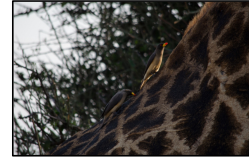

**GT-1:** two birds going up the back of a giraffe.  
**GT-2:** two birds sitting on the the back of a giraffe.  
**M<sup>2</sup>:** a bird on the neck of a giraffe with a  
**GRIT:** two birds sitting on the back of a giraffe

Fig. 2: Qualitative examples from our method (GRIT) and a region-based method ( $M^2$  Transformer) on the COCO test images. Zoom in for better view.

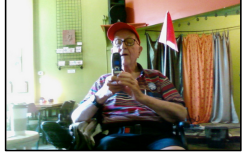

**GT-1:** An elderly man looks at a cell phone.  
**GT-2:** An old man holding up a cell phone to his face.  
**M<sup>2</sup>:** a man is taking a picture of himself on a motorcycle  
**GRIT:** a man sitting in a chair holding a cell phone

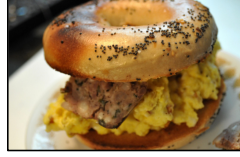

**GT-1:** A bagel sandwich with scrambled egg and bacon.  
**GT-2:** A poppy seed bagel sandwich with eggs and meat.  
**M<sup>2</sup>:** a stack of pancakes on a white plate with a  
**GRIT:** a bagel sandwich with meat and egg on a plate

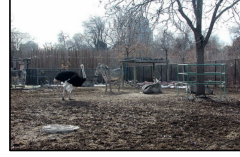

**GT-1:** An ostrich and zebra fenced in with each other.  
**GT-2:** An ostrich standing in a zoo pin near some zebras.  
**M<sup>2</sup>:** a group of chickens and a fence in a field  
**GRIT:** two zebras and an ostrich standing in a zoo

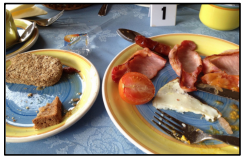

**GT-1:** a table top with some plates of food on it  
**GT-2:** Two plates of breakfast foods on a restaurant table.  
**M<sup>2</sup>:** a plate of food with eggs and meat on a table  
**GRIT:** two plates of food on a table with a fork

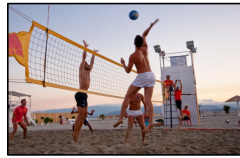

**GT-1:** there are many people in the beach playing volley ball  
**GT-2:** some males on some sand are playing volleyball  
**M<sup>2</sup>:** a group of people playing soccer on the beach  
**GRIT:** a group of men playing volleyball on the beach

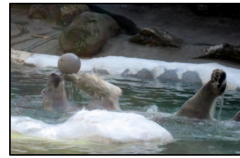

**GT-1:** A polar bear playing with a ball in a small pond area.  
**GT-2:** A bear is playing with a ball in the zoo  
**M<sup>2</sup>:** a group of ducks swimming in the water with a  
**GRIT:** two polar bears playing with a ball in the water

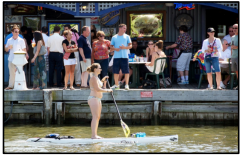

**GT-1:** A woman is paddle boarding down the river.  
**GT-2:** A woman on a paddle board with people in the background.  
**M<sup>2</sup>:** a woman standing on a boat in the water  
**GRIT:** a woman standing on a paddle board in the water

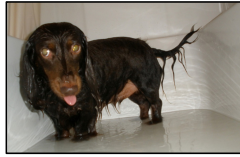

**GT-1:** A wet brown dog in a bath tub.  
**GT-2:** A wet dog in the tub getting a bath  
**M<sup>2</sup>:** two dogs standing in the water with a  
**GRIT:** a wet dog standing in the bath tub

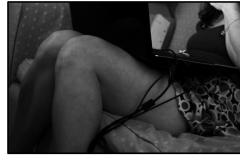

**GT-1:** an image of a woman sitting down on a couch with laptop  
**GT-2:** A lady sitting on a couch with a laptop  
**M<sup>2</sup>:** a woman laying on a bed with a  
**GRIT:** a woman sitting on a couch with a laptop computer

Fig. 3: Qualitative examples from our method (GRIT) and a region-based method ( $M^2$  Transformer) on the COCO test images. Zoom in for better view.



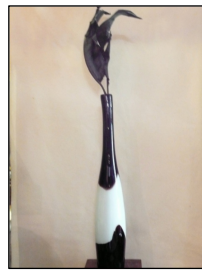

**GT-1:** A dried black flower in a long, tall black & white vase.  
**GT-2:** Thin black and white vase with black flowers.  
**M<sup>2</sup>:** two white vases with a flower in them on a  
**GRIT:** a black and white vase with a flower in it

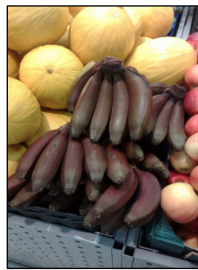

**GT-1:** The bushels of bananas on display are purple  
**GT-2:** A pile of black bananas and other fruit  
**M<sup>2</sup>:** a bunch of fruits and vegetables in a basket  
**GRIT:** a pile of bananas and other fruit on display

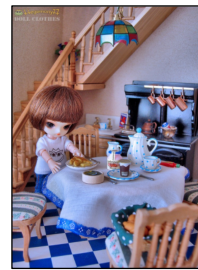

**GT-1:** A doll sitting at a table with fake food  
**GT-2:** The doll is posed at the table eating a meal  
**M<sup>2</sup>:** a young child sitting at a table with a plate of food  
**GRIT:** a doll sitting at a table with a plate of food

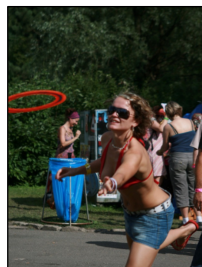

**GT-1:** A woman throwing a frisbee outside at a park  
**GT-2:** a woman is throwing a disk outside in the sun  
**M<sup>2</sup>:** a woman holding a blue umbrella in the street  
**GRIT:** a woman is throwing a frisbee in the street

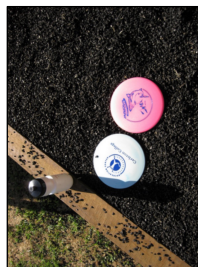

**GT-1:** Two frisbees laying on the ground next to a sports water bottle.  
**GT-2:** Two flying disks on the ground next to a water bottle  
**M<sup>2</sup>:** a knife and a knife on a table with a  
**GRIT:** two frisbees laying on the ground next to a bottle

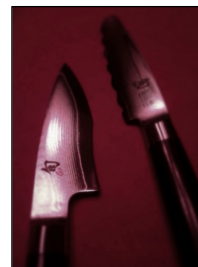

**GT-1:** Two knives are lying on a dark red surface.  
**GT-2:** Two knives placed on a dining table  
**M<sup>2</sup>:** a close up of a red tie with a  
**GRIT:** two knives are on a red table with

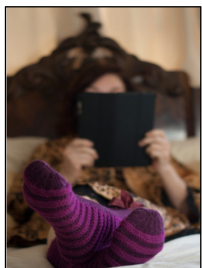

**GT-1:** A woman laying in bed reading a book while wearing purple socks  
**GT-2:** A woman is laying in bed reading a book  
**M<sup>2</sup>:** a dog is looking at a person on a bed  
**GRIT:** a woman laying on a bed with a book

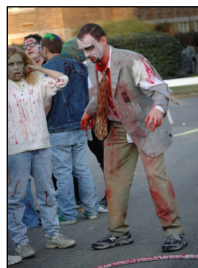

**GT-1:** A zombie walking down a street covered in blood  
**GT-2:** A man dressed like a zombie with other zombies around him.  
**M<sup>2</sup>:** a man in a suit and tie walking with a group of people  
**GRIT:** a man dressed as zombies walking down a street

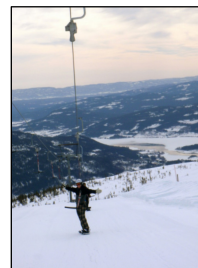

**GT-1:** A person is standing near a ski-lift with a view of mountains  
**GT-2:** A man stands beside a ski lift on a mountain  
**M<sup>2</sup>:** a person riding a snowboard down a snow covered slope  
**GRIT:** a person on a ski lift on a snowy mountain

Fig. 4: Qualitative examples from our method (GRIT) and a region-based method ( $\mathcal{M}^2$  Transformer) on the COCO test images. Zoom in for better view.

## References

1. Achlioptas, P., Ovsjanikov, M., Haydarov, K., Elhoseiny, M., Guibas, L.J.: Artemis: Affective language for visual art. In: Proceedings of the IEEE Conference on Computer Vision and Pattern Recognition. pp. 11569–11579 (2021)
2. Agrawal, H., Desai, K., Wang, Y., Chen, X., Jain, R., Johnson, M., Batra, D., Parikh, D., Lee, S., Anderson, P.: nocaps: novel object captioning at scale. In: Proceedings of the IEEE International Conference on Computer Vision. pp. 8948–8957 (2019)
3. Anderson, P., He, X., Buehler, C., Teney, D., Johnson, M., Gould, S., Zhang, L.: Bottom-up and top-down attention for image captioning and visual question answering. In: Proceedings of the IEEE Conference on Computer Vision and Pattern Recognition. pp. 6077–6086 (2018)
4. Caesar, H., Uijlings, J., Ferrari, V.: Coco-stuff: Thing and stuff classes in context. In: Computer vision and pattern recognition (CVPR), 2018 IEEE conference on. IEEE (2018)
5. Cornia, M., Stefanini, M., Baraldi, L., Cucchiara, R.: Meshed-memory transformer for image captioning. In: Proceedings of the IEEE Conference on Computer Vision and Pattern Recognition. pp. 10578–10587 (2020)
6. Hessel, J., Holtzman, A., Forbes, M., Bras, R.L., Choi, Y.: Clipscore: A reference-free evaluation metric for image captioning. arXiv preprint arXiv:2104.08718 (2021)
7. Jiang, H., Misra, I., Rohrbach, M., Learned-Miller, E., Chen, X.: In defense of grid features for visual question answering. In: Proceedings of the IEEE Conference on Computer Vision and Pattern Recognition. pp. 10267–10276 (2020)
8. Kim, W., Bokyung, S., Ildoo, K., Kim, W.: Vilt: Vision-and-language transformer without convolution or region supervision. In: International Conference on Machine Learning (2021)
9. Liu, Z., Lin, Y., Cao, Y., Hu, H., Wei, Y., Zhang, Z., Lin, S., Guo, B.: Swin transformer: Hierarchical vision transformer using shifted windows. In: Proceedings of the IEEE International Conference on Computer Vision. pp. 10012–10022 (2021)
10. Zhang, P., Li, X., Hu, X., Yang, J., Zhang, L., Wang, L., Choi, Y., Gao, J.: Vinvl: Revisiting visual representations in vision-language models. In: Proceedings of the IEEE Conference on Computer Vision and Pattern Recognition. pp. 5579–5588 (2021)
11. Zhu, X., Su, W., Lu, L., Li, B., Wang, X., Dai, J.: Deformable DETR: Deformable transformers for end-to-end object detection. In: Proceedings of International Conference of Learning Representations (2021)
